# Supplementary material for: A heterogeneous cobalt cubane polymer co-catalyst for cooperative water oxidation
Source: Royal Society of Chemistry journal article supplement (doi:10.1039/d3dt03496h), 2024-01-01
Supplement: d3dt03496h1.pdf [file d3dt03496h1.pdf]

## Supporting Information

# **A Heterogeneous Cobalt Cubane Polymer Co-catalyst for Cooperative Water Oxidation**

Siyuan Li,<sup>a,c,†</sup> Wenchao Jiang,<sup>b,†</sup> Qi Sui,<sup>a</sup> Yujie Gao,<sup>a</sup> and Yi Jiang<sup>a,\*</sup>

<sup>a</sup>College of Chemistry, Liaoning University, Shenyang 110036, Liaoning, China.

<sup>b</sup>School of Chemistry and Materials Science, University of Science and Technology of China, Hefei 230026, China.

<sup>c</sup>Guandong Cawolo Hydrogen Technology Co., LTD, Foshan 528226, Guangdong, China.

<sup>†</sup>These authors contributed equally to this work

## Experimental Section

### Synthesis of $\text{Co}_4\text{O}_4$ molecules water oxidation co-catalyst.

Cobalt cubane ( $\text{Co}_4\text{O}_4$ ) molecules was synthesized by reported work.  $\text{Co}(\text{NO}_3)_2 \cdot 6\text{H}_2\text{O}$  (10 mmol) and  $\text{CH}_3\text{COONa} \cdot 3\text{H}_2\text{O}$  (10 mmol) were initially dissolved in a 250 mL two-necked flask containing 30 mL of methanol and then heated to reflux temperature. Subsequently, 10 mmol of pyridine and 5 mL of hydrogen peroxide (30%) were added separately to the reaction mixture. The mixture was stirred for 4 hours at reflux temperature. Following this, the cooled reaction mixture underwent concentration using a rotary evaporator, and the aqueous layer was separated by the addition of  $\text{CH}_2\text{Cl}_2$ . Anhydrous sulfuric acid was subsequently introduced to the  $\text{CH}_2\text{Cl}_2$  solution to eliminate residual water, followed by further concentration to approximately 5 mL. Chromatographic separation was carried out employing a silica gel column with elution using  $\text{CH}_3\text{OH}$  and  $\text{CH}_2\text{Cl}_2$  (V : V, 1:15). The resulting separated solution was further concentrated to yield a yellow-green powder with a 31% yield, which was then subjected to vacuum-drying for subsequent use.

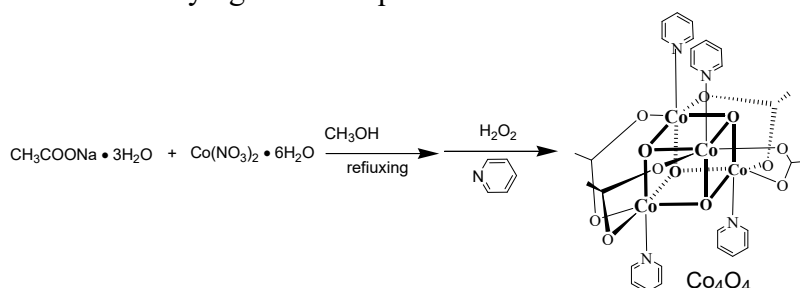

### Synthesis of $\text{Co}_4\text{O}_4$ -poly water oxidation co-catalyst.

$\text{Co}(\text{NO}_3)_2 \cdot 6\text{H}_2\text{O}$  (10 mmol) and  $\text{CH}_3\text{COONa} \cdot 3\text{H}_2\text{O}$  (10 mmol) were first dissolved in a 250 mL two-necked flask containing 30 mL of methanol, and the mixture was then heated to reflux temperature. Subsequently, 10 mmol of 4,4'-bipyridine and 5 mL of hydrogen peroxide (30%) were added separately to the reaction mixture. The stirring persisted for 4 hours at reflux temperature, resulting in the formation of a distinct brown-yellow precipitate in the solution. This turbid suspension underwent suction filtration to eliminate  $\text{CH}_3\text{OH}$  and the aqueous solution, ultimately yielding a brown-yellow precipitate. Subsequent washing with water,  $\text{CH}_2\text{Cl}_2$  and  $\text{CH}_3\text{OH}$  was carried out sequentially to remove any remaining  $\text{Co}(\text{NO}_3)_2$ ,  $\text{CH}_3\text{COONa}$ , and 4,4'-bipyridine ligand. The final precipitate, obtained with a yield of 45%, underwent vacuum drying for subsequent use.

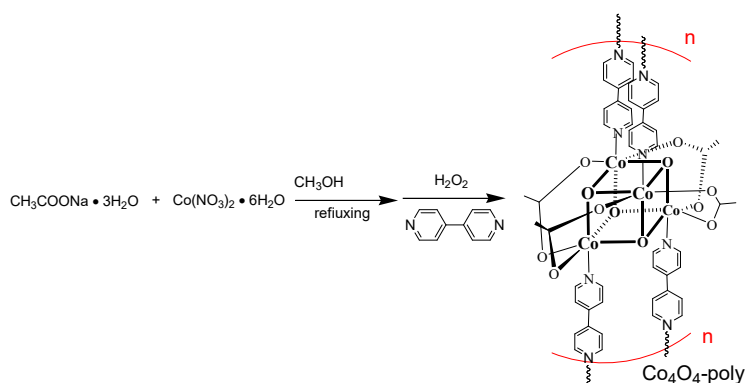

### Fabrication of $\text{BiVO}_4$ photoanode.

In brief, 2.91 g of  $\text{Bi}(\text{NO}_3)_3 \cdot 5\text{H}_2\text{O}$  was dissolved in 150 mL of deionized water containing 9.96 g of KI. The pH of the solution was adjusted to 1.7 by the addition of  $\text{HNO}_3$ . Subsequently, 60 mL of absolute ethanol containing 1.49 g of p-benzoquinone was introduced into the solution with vigorous stirring. Electrodeposition was performed using a CHI660 with a three-electrode setup, maintaining

the process at -0.1 V vs. Ag/AgCl for 5 minutes to create a layer of BiOI. Following this, 100  $\mu\text{L}$  of a DMSO solution containing 0.23 M vanadium acetone oxide was applied onto the BiOI surface, and the sample was annealed at 450  $^{\circ}\text{C}$  (ramping rate = 2  $^{\circ}\text{C}/\text{min}$ ) for 2 hours. After annealing, the resulting photoanodes were immersed in 1 M NaOH solution under stirring for 30 minutes to dissolve  $\text{V}_2\text{O}_5$ . The  $\text{BiVO}_4$  photoanode obtained was rinsed with deionized water and subsequently dried using nitrogen.

#### **Fabrication of $\text{Co}_4\text{O}_4/\text{BiVO}_4$ and $\text{Co}_4\text{O}_4\text{-poly}/\text{BiVO}_4$ photoanode.**

Weigh equal amounts of substances  $\text{Co}_4\text{O}_4$  and  $\text{Co}_4\text{O}_4\text{-poly}$ , dispersing them individually in methanol using ultrasonication to achieve even distribution. Next, apply equal volumes of the catalyst solutions separately onto a  $\text{BiVO}_4$  electrode. Allow them to naturally air dry, rinse with water prior to use, and then dry them using nitrogen gas.

#### **Photocatalytic performance measurement**

The photocatalytic  $\text{O}_2$  evolution reactions was carried out in a Labsolar-6A reactor (Beijing Perceptlight) and evacuation system using a 300 W Xe lamp (Ushio-CERMAX LX300) with an optical cut-off filter ( $\lambda \geq 420$  nm). The photocatalyst (0.1 g) was dispersed in 100 mL aqueous solution contained  $\text{NaIO}_3$  (5.0 mM) in a pyrex reaction cell and thoroughly degassed by evacuation in order to drive off the air inside. The evolved  $\text{O}_2$  was quantified using an online gas chromatograph with argon (Ar) as the carrier gas. Samples were collected at 30-minute intervals to compare the  $\text{O}_2$  production of different photocatalysts.

#### **Photoelectrochemical (PEC) measurement.**

PEC experiments were conducted in a three-electrode electrochemical cell using a CHI 660E instrument potentialstat (Shanghai Chenhua Instrument Co., Ltd.) at 25 $^{\circ}\text{C}$ . The three-electrode system consisted of the as-prepared photoanode as the working electrode, a platinum tablet as the counter electrode, and a Ag/AgCl electrode as the reference electrode. A Xe lamp (CEL-HXF300C) equipped with an AM 1.5G-filter was used for photoanode irradiation, and the light intensity was calibrated to 100  $\text{mW}/\text{cm}^2$ . The light irradiation was applied from behind the photoanode. J-V curves were obtained via linear sweep voltammetry at a scan rate of 20  $\text{mV}/\text{s}$ . Typically, a 0.1 M phosphate buffer solution (PBS, pH 7) served as the electrolyte. The conversion between potentials vs. Ag/AgCl and vs. RHE was performed using the equation:

$$E \text{ (vs. RHE)} = E \text{ (vs. Ag/AgCl)} + 0.0591 \text{ V} \times \text{pH} + E_{\text{Ag/AgCl}} \text{ (reference)}$$

The applied bias photon-to-current efficiency (ABPE) was calculated from the J-V curve, where J is the photocurrent density,  $V_{\text{bias}}$  is the applied bias, and  $P_{\text{in}}$  is the incident illumination power density (AM 1.5G, 100  $\text{mW}/\text{cm}^2$ ),

$$ABPE = \frac{J \times (1.23 - V_{\text{bia}})}{P_{\text{in}}} \times 100\%$$

The photocurrent density arising from PEC water oxidation can be described as:

$$J_{\text{H}_2\text{O}} = J_{\text{abs}} \times \eta_{\text{sep}} \times \eta_{\text{inj}}$$

Here,  $J_{\text{abs}}$  denotes the photocurrent density when absorbed photons are fully converted into current,  $\eta_{\text{sep}}$  represents the charge separation efficiency of photogenerated holes, referring to bulk recombination, and  $\eta_{\text{inj}}$  signifies the charge transfer efficiency of surface-reaching holes into the electrolyte. By using  $\text{Na}_2\text{SO}_3$  as a hole scavenger, surface recombination is eliminated ( $\eta_{\text{inj}} = 1$ ), and

the photocurrent density can be described as:

$$J_{Na_2SO_3} = J_{abs} \times \eta_{sep}$$

So the  $\eta_{inj}$  can be described as:

$$\eta_{inj} = \frac{J_{H_2O}}{J_{Na_2SO_3}}$$

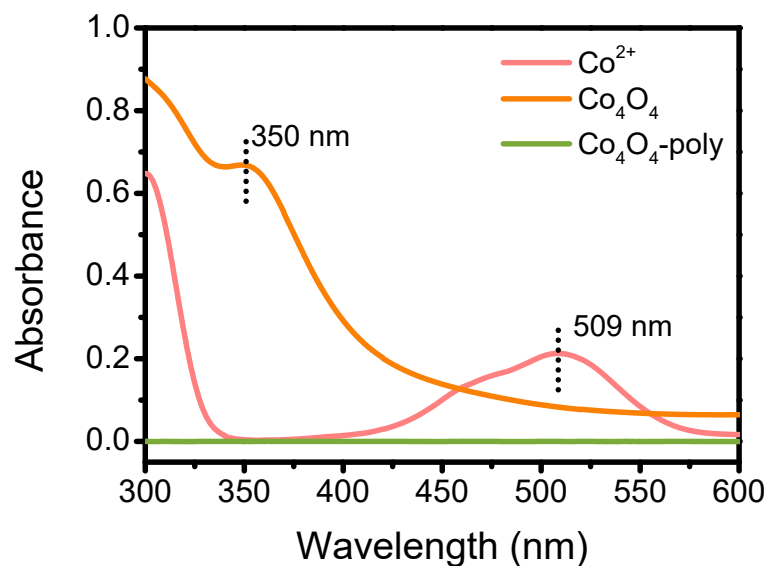

**Figure S1.** UV-vis spectra of water solutions containing  $\text{Co}^{2+}$  ions,  $\text{Co}_4\text{O}_4$  molecules and  $\text{Co}_4\text{O}_4\text{-poly}$  (filtered the precipitate).

As shown in **Figure S1**, the water solution containing  $\text{Co}_4\text{O}_4$  molecules exhibits obvious peaks at 350 nm. In contrast, the water solution containing  $\text{Co}_4\text{O}_4\text{-poly}$ , when the precipitate is filtered, shows almost no absorbance. This further confirms that  $\text{Co}_4\text{O}_4\text{-poly}$  lacks  $\text{Co}^{2+}$  ions and other soluble impurities.

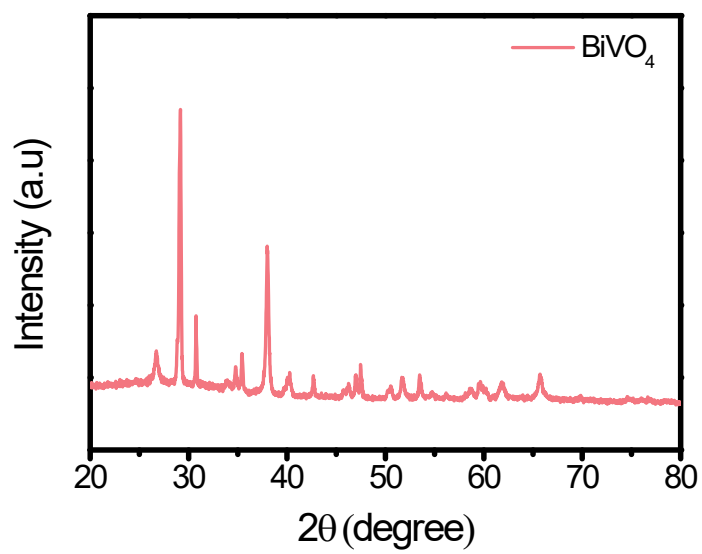

**Figure S2.** XRD pattern of BiVO<sub>4</sub>.

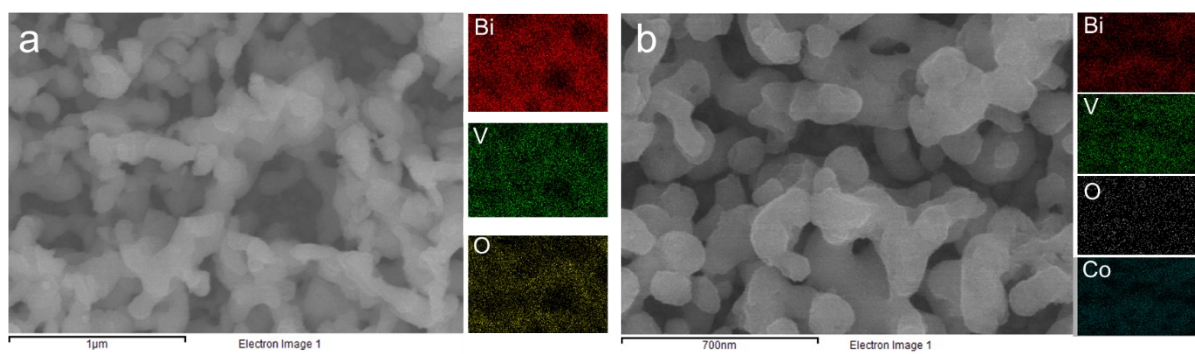

**Figure S3.** SEM and EDS-mapping images of (a) BiVO<sub>4</sub> and (b) Co<sub>4</sub>O<sub>4</sub>/BiVO<sub>4</sub>.

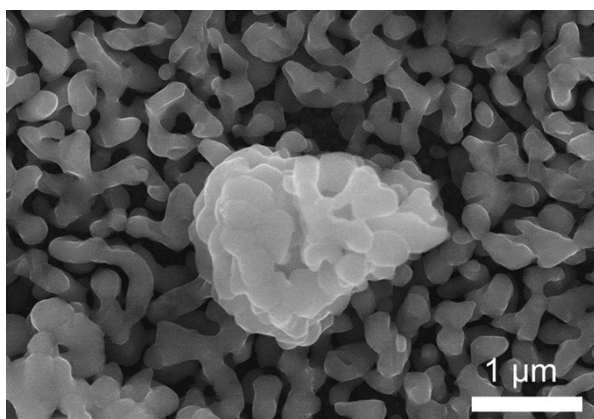

**Figure S4.** SEM image of  $\text{Co}_4\text{O}_4$ -poly/ $\text{BiVO}_4$ .



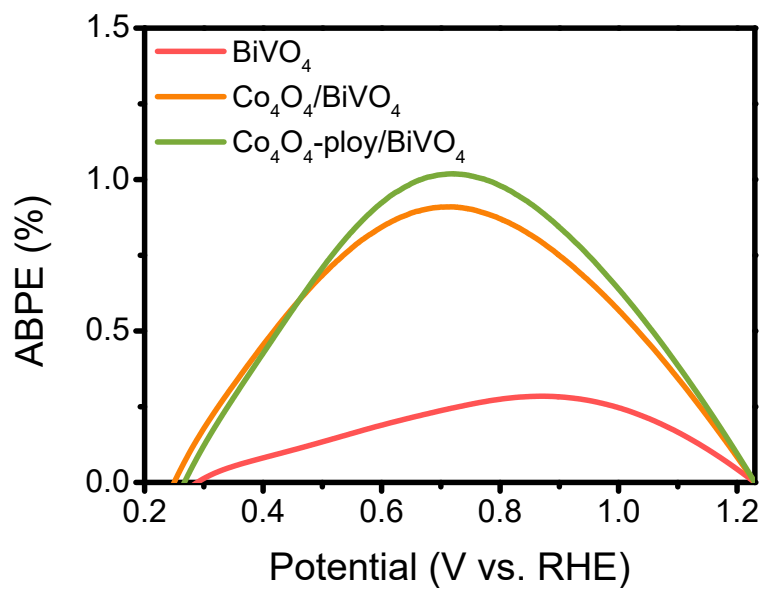

**Figure S5.** ABPE values of BiVO<sub>4</sub>-based photoanods.

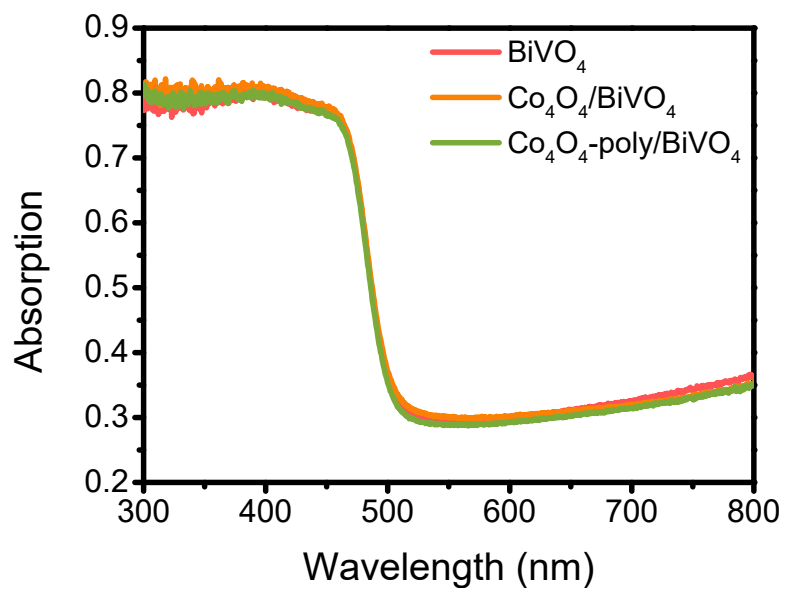

**Figure S6.** UV-vis spectra of BiVO<sub>4</sub>-based photoanodes.

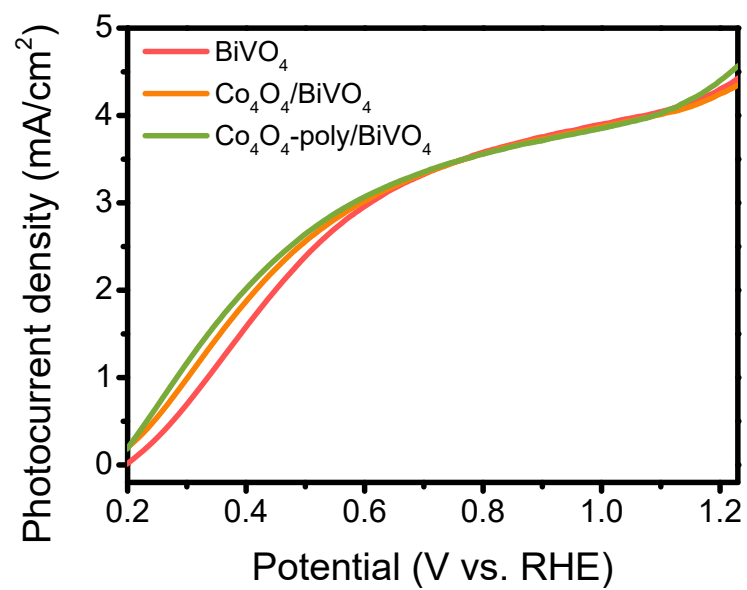

**Figure S7.** The LSV curves of BiVO<sub>4</sub>-based photoanodes in Na<sub>2</sub>SO<sub>3</sub>.

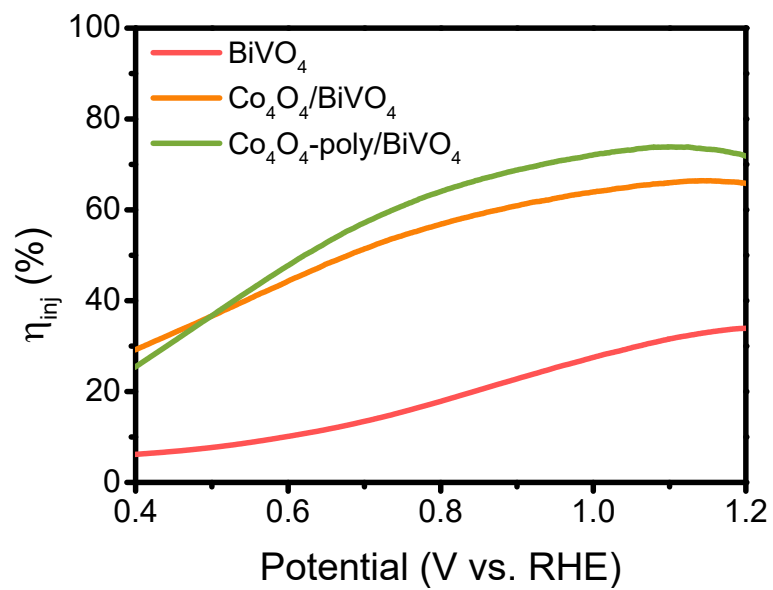

**Figure S8.** The charge injection efficiencies of  $\text{BiVO}_4$ -based photoanodes.

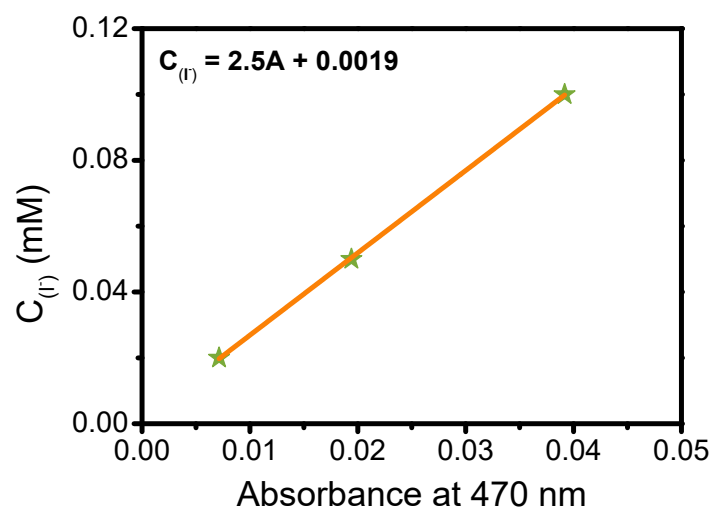

**Figure S9.** Calibration curve for the quantitative analysis of I<sup>-</sup> ion. (I<sub>3</sub><sup>-</sup> ions, characterized by yellow absorbance (peak top: 470 nm), were generated by adding 5 mL of HNO<sub>3</sub> to 5 mL of sample solutions.)

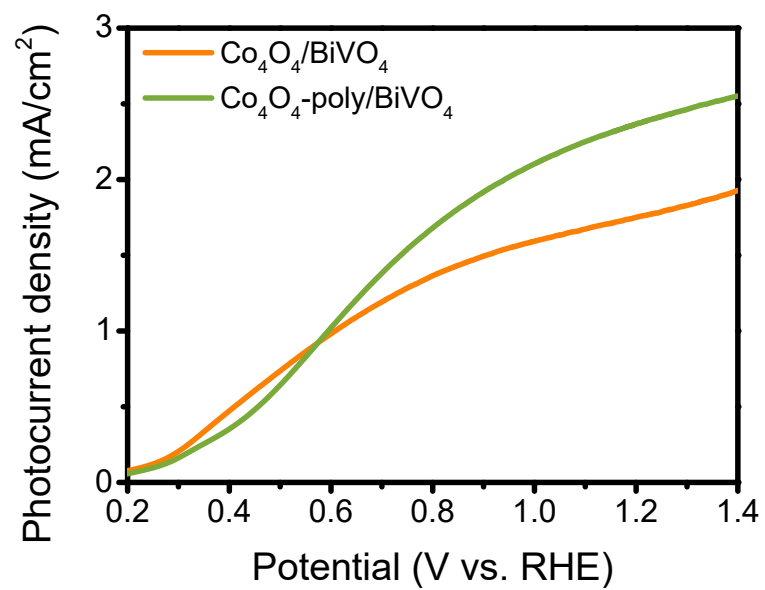

**Figure S10.** The LSV curves of BiVO<sub>4</sub>-based photoanodes in D<sub>2</sub>O.

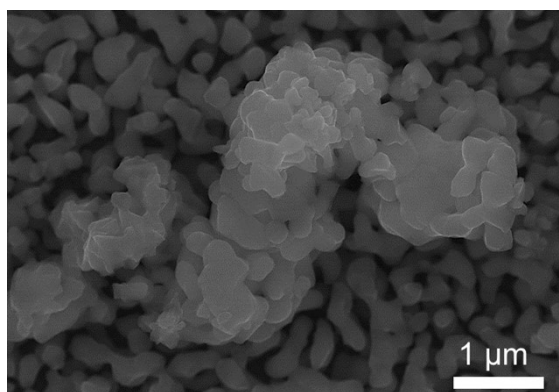

**Figure S11.** SEM image of  $\text{Co}_4\text{O}_4\text{-poly/BiVO}_4$  after prolonged electrolysis.

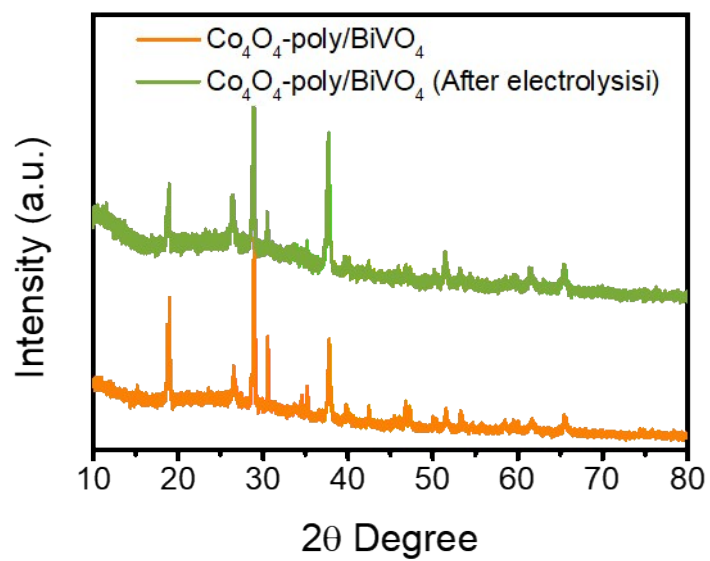

**Figure S12.** XRD patterns of Co<sub>4</sub>O<sub>4</sub>-poly/BiVO<sub>4</sub> before and after prolonged electrolysis.



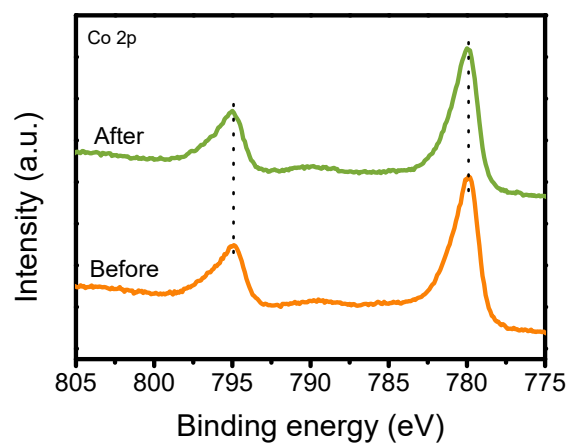

**Figure S13.** HR-XPS spectra of Co 2p for  $\text{Co}_4\text{O}_4$ -poly/ $\text{BiVO}_4$  before and after prolonged electrolysis.

**Table S1.** PEC water oxidation performances of recently reported molecule/semiconductor hybrid photoanodes.

| Photoanodes                                                  | Electrolyte                                  | Photocurrent density<br>(mA/cm <sup>2</sup> @ 1.23 V <sub>RHE</sub> ) | References       |
|--------------------------------------------------------------|----------------------------------------------|-----------------------------------------------------------------------|------------------|
| (Co <sub>4</sub> O <sub>4</sub> )1h/BiVO <sub>4</sub>        | 0.5 M borate buffer (pH 9.3)                 | 5.0                                                                   | [1]              |
| Fe-PBI/BiVO <sub>4</sub>                                     | 0.2 M borate buffer (pH 8.2)                 | 1.3                                                                   | [2]              |
| Co <sub>4</sub> O <sub>4</sub> /BiVO <sub>4</sub>            | 0.5 M borate buffer (pH 8)                   | 3.3                                                                   | [3]              |
| Co <sub>2</sub> /BiVO <sub>4</sub>                           | 0.1 M PBS (pH 7.0)                           | 4.3                                                                   | [4]              |
| Cobim/BVO-20                                                 | 0.5 M Na <sub>2</sub> SO <sub>4</sub> (pH 7) | 3.1                                                                   | [5]              |
| Ni <sub>4</sub> O <sub>4</sub> /BiVO <sub>4</sub>            | 0.2 M PBS (pH 7)                             | 3.9                                                                   | [6]              |
| poly-1/Vpa/Al <sub>2</sub> O <sub>3</sub> /BiVO <sub>4</sub> | 0.1 M PBS (pH 7.0)                           | 2.8                                                                   | [7]              |
| <b>Co<sub>4</sub>O<sub>4</sub>-poly/BiVO<sub>4</sub></b>     | <b>0.1 M PBS (pH 7.0)</b>                    | <b>3.2</b>                                                            | <b>This work</b> |

## References

- [1] Y. Wang, F. Li, X. Zhou, F. Yu, J. Du, L. Bai, L. Sun, *Angew Chem Int Ed.* **2017**, *56*, 6911-6915.
- [2] T. Benkó, S. Shen, M. Németh, J. Su, Á. Szamosvölgyi, Z. Kovács, G. Sáfrán, S. M. Al-Zurairi, E. Z. Horváth, A. Sági, Z. Kónya, J. S. Pap, *Appl catal A-gen.* **2023**, *652*, 119035.
- [3] H. Chen, J. Li, L. Meng, S. Bae, R. Erni, D. F. Abbott, S. Li, C. A. Triana, V. Mougél and G. R. Patzke, *Adv Funct Materials.* **2023**, *33*, 2307862
- [4] Y. D. Liu, Y. Jiang, F. Li, F. S. Yu, W. C. Jiang, L. X. Xia, *J. Mater. Chem. A* **2018**, *6*, 10761-10768.
- [5] W. Zhang, R. Li, X. Zhao, Z. Chen, A. W. K. Law, K. Zhou, *ChemSusChem* **2018**, *11*, 2710-2716.
- [6] B. Gao, T. Wang, X. L. Fan, H. Gong, P. Li, Y. Y. Feng, X. L. Huang, J. P. He, J. H. Ye, *J. Mater. Chem. A* **2019**, *7*, 278-288.
- [7] W. Jiang, X. Yang, F. Li, Q. Zhang, S. Li, H. Tong, Y. Jiang and L. Xia, *Chem. Commun.* **2019**, *55*, 1414-1417.
